# Supplementary material for: Regulatory and Enterotoxin Gene Expression and Enterotoxins Production in Staphylococcus aureus FRI913 Cultures Exposed to a Rotating Magnetic Field and trans-Anethole
Source: MDPI journal article supplement (doi:10.3390/ijms23116327), 2022-06-06
Supplement: s1 [file s1]

**Table S1.** Statistical analysis of eight candidate housekeeping genes.

| Statistics     | Gene name |            |            |             |             |             |             |            |
|----------------|-----------|------------|------------|-------------|-------------|-------------|-------------|------------|
|                | 16S rRNA  | <i>pta</i> | <i>rho</i> | <i>gyrB</i> | <i>recA</i> | <i>rplD</i> | <i>rpoB</i> | <i>tpo</i> |
| GM [Cq]        | 22.77     | 26.58      | 30.22      | 26.33       | 31.43       | 30.95       | 29.96       | 27.19      |
| Min [Cq]       | 21.81     | 25.03      | 25.48      | 24.58       | 26.30       | 27.18       | 24.76       | 24.90      |
| Max [Cq]       | 23.60     | 28.00      | 33.76      | 27.41       | 36.70       | 34.09       | 34.56       | 30.18      |
| SD [ $\pm$ Cq] | 0.44      | 0.90       | 2.96       | 1.04        | 3.17        | 2.05        | 2.66        | 1.92       |
| CV [% Cq]      | 1.95      | 3.38       | 9.73       | 3.95        | 10.01       | 6.59        | 8.83        | 7.03       |
| CC [r]         | 0.930     | 0.877      | 0.811      | -0.034      | 0.595       | -0.068      | -0.133      | 0.669      |
| <i>p</i> value | 0.001     | 0.001      | 0.001      | 0.915       | 0.041       | 0.830       | 0.683       | 0.017      |

Cq – cycle of quantification; GM – geometric mean; Min – minimal value; Max – maximal value; SD – standard deviation; CV – coefficient of variance; CC [r] – correlation coefficient between each candidate and the BestKeeper index. BestKeeper performs repeated pairwise correlation and regression analyses for a given gene with all other genes.

**Table S2.** Cycle of quantification (Cq) obtained in this study.

| Samples                         | Media | Cq $\pm$ SEM     |                  |                  |                  |                  |                  |                  |
|---------------------------------|-------|------------------|------------------|------------------|------------------|------------------|------------------|------------------|
|                                 |       | 16S rRNA         | <i>sea</i>       | <i>sec</i>       | <i>sel</i>       | <i>agrA</i>      | <i>hld</i>       | <i>rot</i>       |
| Unexposed to the RMFs (control) | A     | 18.15 $\pm$ 0.24 | 29.17 $\pm$ 0.17 | 27.38 $\pm$ 0.30 | 22.83 $\pm$ 0.31 | 22.75 $\pm$ 0.23 | 23.75 $\pm$ 0.29 | 25.89 $\pm$ 0.13 |
|                                 | B     | 19.59 $\pm$ 0.13 | 30.85 $\pm$ 0.25 | 29.01 $\pm$ 0.59 | 24.09 $\pm$ 0.65 | 23.90 $\pm$ 0.53 | 25.02 $\pm$ 1.0  | 26.95 $\pm$ 0.18 |
|                                 | C     | 18.23 $\pm$ 0.39 | 28.44 $\pm$ 0.44 | 27.80 $\pm$ 0.35 | 22.67 $\pm$ 0.15 | 21.67 $\pm$ 0.24 | 23.01 $\pm$ 0.37 | 25.62 $\pm$ 0.65 |
| Exposed to the RMF I (5 Hz)     | A     | 19.25 $\pm$ 0.08 | 30.22 $\pm$ 0.69 | 29.22 $\pm$ 0.39 | 24.70 $\pm$ 0.26 | 23.76 $\pm$ 0.66 | 24.42 $\pm$ 0.18 | 27.38 $\pm$ 0.36 |
|                                 | B     | 19.67 $\pm$ 0.22 | 30.17 $\pm$ 0.13 | 28.91 $\pm$ 0.51 | 20.61 $\pm$ 0.84 | 23.68 $\pm$ 0.21 | 25.10 $\pm$ 0.23 | 26.63 $\pm$ 0.57 |
|                                 | C     | 19.41 $\pm$ 1.04 | 31.27 $\pm$ 0.19 | 29.27 $\pm$ 0.19 | 23.14 $\pm$ 0.92 | 23.74 $\pm$ 0.18 | 24.90 $\pm$ 0.11 | 26.90 $\pm$ 0.11 |
| Exposed to the RMF II (50 Hz)   | A     | 16.97 $\pm$ 0.03 | 24.90 $\pm$ 0.68 | 28.31 $\pm$ 0.36 | 21.82 $\pm$ 0.22 | 20.42 $\pm$ 0.38 | 21.85 $\pm$ 0.06 | 23.90 $\pm$ 0.56 |
|                                 | B     | 18.45 $\pm$ 0.49 | 26.68 $\pm$ 0.10 | 27.80 $\pm$ 0.97 | 23.51 $\pm$ 0.24 | 21.70 $\pm$ 0.15 | 23.81 $\pm$ 0.26 | 25.28 $\pm$ 0.23 |
|                                 | C     | 19.61 $\pm$ 0.39 | 30.68 $\pm$ 0.41 | 30.15 $\pm$ 0.65 | 24.80 $\pm$ 0.56 | 23.73 $\pm$ 0.35 | 24.15 $\pm$ 0.35 | 27.08 $\pm$ 0.16 |

SEM – standard error of measurement; RMF – rotating magnetic field; A – Mueller-Hinton agar (MHA) non-supplemented with *trans*-anethole; B – MHA supplemented with 1% (*v/v*) Tween 80; C – MHA supplemented with 1% (*v/v*) Tween 80 and subinhibitory concentration (MIC<sub>50</sub>) of *trans*-anethole.

**Table S3.** Correlation analysis between staphylococcal enterotoxin (SE) genes expression and SEs production.

| Samples                         | SE                 | Media | Spearman coefficient [r] | <i>p</i> value |
|---------------------------------|--------------------|-------|--------------------------|----------------|
| Unexposed to the RMFs (control) |                    | A+B+C | 0.7622                   | 0.0040         |
| Exposed to the RMF I (5 Hz)     | <i>sea</i> vs. SEA | A+B+C | 0.7566                   | 0.0044         |
| Exposed to the RMF II (50 Hz)   |                    | A+B+C | 0.5359                   | 0.0725         |
| Unexposed to the RMFs (control) |                    | A+B+C | 0.8392                   | 0.0006         |
| Exposed to the RMF I (5 Hz)     | <i>sec</i> vs. SEC | A+B+C | -0.2487                  | 0.4357         |
| Exposed to the RMF II (50 Hz)   |                    | A+B+C | 0.0541                   | 0.8674         |
| Unexposed to the RMFs (control) |                    | A+B+C | 0.5315                   | 0.0754         |
| Exposed to the RMF I (5 Hz)     | <i>sel</i> vs. SEL | A+B+C | -0.4685                  | 0.1245         |
| Exposed to the RMF II (50 Hz)   |                    | A+B+C | -0.3986                  | 0.1993         |

RMF – rotating magnetic field; A – Mueller-Hinton agar (MHA) non-supplemented with *trans*-anethole; B – MHA supplemented with 1% (*v/v*) Tween 80; C – MHA supplemented with 1% (*v/v*) Tween 80 and MIC<sub>50</sub> of *trans*-anethole.

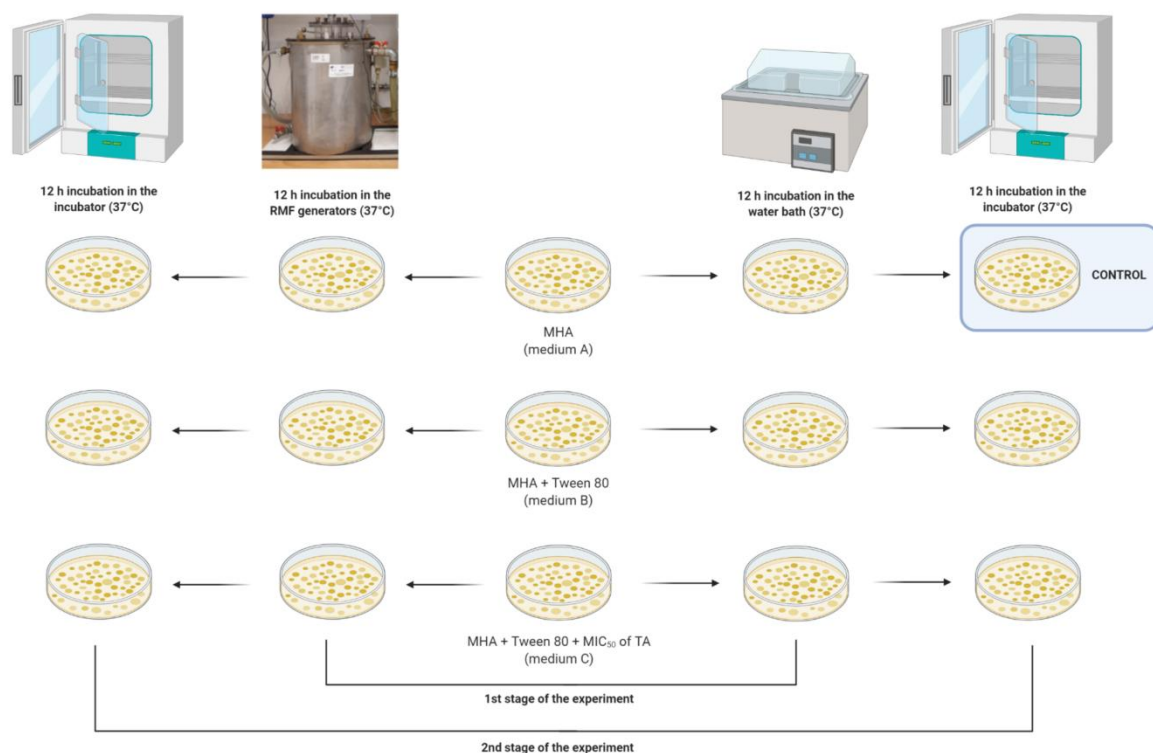

**Figure S1.** Schematic diagram of the experiment. Created with BioRender.com.

**Table S4.** Primer sequences for real-time quantitative PCR analysis.

| Gene        | Sequence                                                                               | Amplicon length (bp) | References |
|-------------|----------------------------------------------------------------------------------------|----------------------|------------|
| <i>sea</i>  | F: 5'-CAG CAT ACT ATA TTG TTT AAA GGC-3'<br>R: 5'-CCT CTG AAC CTT CCC ATC-3'           | 400                  | [1]        |
| <i>sec</i>  | F: 5'-CTC AAG AAC TAG ACA TAA AAG CTA GG-3'<br>R: 5'-TCA AAA TCG GAT TAA CAT TAT CC-3' | 271                  | [1]        |
| <i>sel</i>  | F: 5'-TAA CGG CGA TGT AGG TCC AGG-3'<br>R: 5'-CAT CTA TTT CTT GTG CGG TAA C-3'         | 383                  | [1]        |
| <i>agrA</i> | F: 5'-CCT CGC AAC TGA TAA TCC TTA TG-3'<br>R: 5'-ACG AAT TTC ACT GCC TAA TTT GA-3'     | 127                  | [2]        |
| <i>hld</i>  | F: 5'-TAA GGA AGG AGT GAT TTC AAT GG-3'<br>R: 5'-GTG AAT TTG TTC ACT GTG TCG AT-3'     | 90                   | [2]        |
| <i>rot</i>  | F: 5'-TGC AGT ATT TCA ACC ACA CAC-3'<br>R: 5'-GTA TCG TTA ATG CGC CAG T-3'             | 140                  | [2]        |

## References

1. Park, J.Y.; Fox, L.K.; Seo, K.S.; McGuire, M.A.; Park, Y.H.; Rurangirwa, F.R.; Sischo, W.M.; Bohach, G.A. Detection of classical and newly described staphylococcal superantigen genes in coagulase-negative staphylococci isolated from bovine intramammary infections. *Vet. Microbiol.* **2011**, *147*, 149–154, doi:10.1016/j.vetmic.2010.06.021.
2. Schubert, J.; Podkowik, M.; Bystroń, J.; Bania, J. Production of staphylococcal enterotoxins D and R in milk and meat juice by *Staphylococcus aureus* strains. *Foodborne Pathog. Dis.* **2017**, *14*, 223–230, doi:10.1089/fpd.2016.2210.
